# Supplementary material for: Formation and structure of the potassium complex of valinomycin in solution studied by Raman optical activity spectroscopy
Source: Royal Society of Chemistry journal article supplement (doi:10.1039/c003277h), 2010-01-01
Supplement: c003277h.pdf [file c003277h.pdf]

## Supporting Information

### Formation and Structure of the Potassium Complex of Valinomycin in Solution Studied by the Raman Optical Activity Spectroscopy

*Shigeki Yamamoto, Michal Straka, Hitoshi Watarai, and Petr Bouř*

#### Contents

**Table S1.** Vibrational assignment.

**Table S2.** Calculated relative energies of all  $C_3$  symmetric  $K^+$ -valinomycin complex conformers.

**Table S3.** Calculated equilibrium side chain torsional angles.

**Table S4.** Twelve AM1 lowest energy conformers

**Table S5.** Functional performance comparison.

**Figure S1.** Relative energies of the (left) 27 symmetric ( $C_3$ ) and (right) 12 lowest-AM1 energy valinomycin. $K^+$  conformers calculated at different approximation levels. For the AM1 and PM3 methods a pseudo-atom was used instead of  $K^+$  as described in the text.

**Figure S2.** Lowest-energy conformation (BPW91/6-31G\*\*/CPCM(MeOH)) of the potassium-valinomycine complex, top, bottom and side view.

**Figure S3.** ROA complex spectra simulated with the local  $G'$  and  $A$  tensor parts at the HF/3-21G, HF/6-31G and HF/6-31G\*\* levels, with the B3LYP/6-31++G\*\*/CPCM force field and Raman polarizability.

**Figure S4.** Distribution of the isopropyl torsional angles obtained from the MD simulations, and their time development (L-Val: red, D-Hiv: blue, D-Val: green) during a 1.5 ns run.

**Figure S5.** Experimental and calculated  $CID=(I^R-I^L)/(I^R+I^L)$  ratios obtained by a direct division of the ROA and Raman spectra.

**Figure S6.** Raman spectra of the L-Lac-L-Val-D-Hiv-D-Val- $K^+$  model fragment calculated with several functionals.

**Figure S7.** Oxygen probability distribution (methanol oxygens in green circles, first hydration sphere included only) obtained for the valinomycin complex soaked in methanol.

**Figure S8.** Twenty random MD snapshots (MD parameters are listed in caption of Figure S7) of the valinomycin complex and methanol.

**Figure S9.** The fitted (red, based on the B3BPW91/6-31++G\*\*/CPCM(MeOH)/HF/6-31G\*\* conformer subspectra) and experimental (black) ROA (top) and Raman (bottom) spectra of the  $K^+$ -valinomycin complex.

**Table S1.** Vibrational assignment of most intense Raman peaks in the K<sup>+</sup>-valinomycin complex, based on the BP86/SVP computation.

| BP86 | BPW91/<br>6-<br>31G** | BPW91/6-<br>31G**/CP<br>CM | B3LYP/6-<br>31++G**/C<br>PCM | Exp  | assignment                                                                             |
|------|-----------------------|----------------------------|------------------------------|------|----------------------------------------------------------------------------------------|
| 1745 | 1776                  | 1740                       | 1771                         | 1757 | $\nu(\text{C}=\text{O})$ , ester, sym.                                                 |
| 1686 | 1676                  | 1662                       | 1688                         | 1661 | $\nu(\text{C}=\text{O})$ , amide                                                       |
| 1656 | 1665                  | 1643                       | 1671                         | 1646 | $\nu(\text{C}=\text{O})$ , amide, sym.                                                 |
| 1520 | 1578                  | -                          | 1567                         | 1535 | Amide II ( $\delta(\text{NH})$ )                                                       |
| 1446 | 1525                  | 1470                       | 1502                         | 1468 | $\delta(\text{CH}_3)$ , asym                                                           |
| 1427 | 1508                  | 1455                       | 1487                         | 1447 |                                                                                        |
| 1375 |                       |                            | 1408                         | 1395 | $\delta(\text{CH}_3)$ , sym                                                            |
| 1357 | 1423                  |                            | 1403                         | 1376 |                                                                                        |
| 1332 | 1398                  |                            | 1382                         | 1352 | $\delta(\text{C}_\alpha\text{H}) + \delta(\text{C}_\beta\text{H})$                     |
| 1294 | 1358                  | 1285                       | 1331                         | 1313 | $\delta(\text{NH}) + \delta(\text{C}_\alpha\text{H}) + \delta(\text{C}_\beta\text{H})$ |
|      | 1316                  | 1262                       | 1300                         | 1266 | $\delta(\text{C}_\alpha\text{H}) + \delta(\text{C}_\beta\text{H})$                     |
|      | 1302                  | 1238                       | 1283                         | 1249 | Amide III ( $\delta(\text{NH})$ , i.p.)                                                |
| 1179 | 1219                  | 1173                       | 1215                         | 1192 | isopropyl                                                                              |
| 1156 |                       | 1140                       | 1170                         | 1154 |                                                                                        |
| 1116 | 1159                  | 1114                       | 1144                         | 1128 | Amide + isopropyl                                                                      |
|      |                       |                            | 1144                         | 1098 |                                                                                        |
|      |                       |                            | 1107                         |      |                                                                                        |
|      |                       |                            | 1034                         | 1045 |                                                                                        |
|      |                       |                            | 1014                         | 1020 |                                                                                        |
|      |                       |                            | 982                          | 981  |                                                                                        |
|      |                       |                            | 968                          | 962  | $\rho(\text{CH}_3)$ , isopropyl                                                        |
| 924  |                       |                            | 944                          | 941  |                                                                                        |
| 871  |                       |                            | 886                          | 887  |                                                                                        |
|      |                       |                            | 868                          | 865  |                                                                                        |
|      |                       |                            | 844                          | 841  | Amide V ( $\delta(\text{NH})$ , oop)                                                   |
|      |                       |                            | 791                          | 792  |                                                                                        |
| 727  |                       | 716                        | 745                          | 745  | Amide VI ( $\delta(\text{COO})$ , oop.) + CH <sub>3</sub>                              |
|      |                       | 669                        | 683                          | 673  | Amide VI ( $\delta(\text{COO})$ , o.p.) + CH <sub>3</sub>                              |
|      |                       | 650                        | 663                          | 652  |                                                                                        |
|      |                       | 629                        | 652                          | 638  |                                                                                        |
|      |                       | 611                        | 634                          | 629  |                                                                                        |
| 478  | 499                   | 470                        | 487                          | 491  | All atom without COO                                                                   |
| 401  | 417                   | 396                        | 410                          | 408  | isopropyl + COO                                                                        |
| 338  | 352                   | 334                        | 345                          | 345  | Amide V ( $\delta(\text{NH})$ , o.p.) + isopropyl                                      |
|      | 330                   | 308                        | 321                          | 321  | Ring breathing                                                                         |
|      |                       |                            | 219                          | 224  | $\tau(\text{CH}_3)$                                                                    |
| RMS: |                       |                            |                              |      |                                                                                        |
| 15   | 32                    | 15                         | 22                           | 0    |                                                                                        |

**Table S2.** Calculated relative energies of all  $C_3$  symmetric  $K^+$ -valinomycin complex conformers

|     | AM1  | PM3  | HF/3-<br>21G | BPW91/6-<br>31G** | vdW-<br>BPW916-31G**/<br>31G**/cpcm | BPW91/6-<br>31G** | B3LYP/6-<br>31G** | vdW-<br>HF/3-<br>21G |
|-----|------|------|--------------|-------------------|-------------------------------------|-------------------|-------------------|----------------------|
| s1  | 7.9  | 5.9  | 19.2         | 22.9              | 13.2                                | 19.5              | 17.5              | 14.5                 |
| s2  | 8.4  | 11.8 | 18.8         | 25.5              | 11.6                                | 21.8              | 19.0              | 13.1                 |
| s3  | 7.7  | 8.0  | 18.1         | 20.2              | 13.6                                | 22.0              | 19.3              | 15.8                 |
| s4  | 10.1 | 12.0 | 18.0         | 21.0              | 14.1                                | 19.6              | 19.9              | 15.3                 |
| s5  | 8.9  | 5.6  | 18.5         | 23.4              | 11.2                                | 20.1              | 18.6              | 12.2                 |
| s6  | 9.6  | 11.0 | 18.8         | 25.2              | 12.5                                | 18.3              | 19.7              | 13.7                 |
| s7  | 4.4  | 7.5  | 9.1          | 11.7              | 4.4                                 | 11.3              | 10.5              | 1.7                  |
| s8  | 4.0  | 2.0  | 9.2          | 9.0               | 4.3                                 | 9.5               | 9.0               | 2.6                  |
| s9  | 4.2  | 8.0  | 7.6          | 11.9              | 5.9                                 | 11.7              | 10.7              | 3.3                  |
| s10 | 7.3  | 11.5 | 17.3         | 23.5              | 12.8                                | 14.8              | 16.0              | 15.1                 |
| s11 | 13.3 | 13.2 | 26.4         | 18.4              | 14.9                                | 20.8              | 19.3              | 11.1                 |
| s12 | 14.4 | 13.9 | 20.5         | 18.7              | 15.7                                | 22.3              | 19.6              | 18.6                 |
| s13 | 8.4  | 11.0 | 18.0         | 15.8              | 10.9                                | 19.0              | 16.8              | 12.7                 |
| s14 | 13.4 | 12.8 | 20.3         | 19.2              | 14.5                                | 21.4              | 19.8              | 15.8                 |
| s15 | 9.1  | 12.8 | 20.2         | 19.7              | 16.8                                | 21.9              | 20.4              | 18.2                 |
| s16 | 3.1  | 6.2  | 8.0          | 9.4               | 6.9                                 | 11.0              | 7.7               | 7.2                  |
| s17 | 2.9  | 6.6  | 10.1         | 10.4              | 6.8                                 | 9.4               | 10.4              | 5.3                  |
| s18 | 3.2  | 8.7  | 10.2         | 10.5              | 8.3                                 | 11.1              | 10.7              | 7.3                  |
| s19 | 2.3  | 4.9  | 9.8          | 7.8               | 6.0                                 | 8.7               | 8.3               | 3.7                  |
| s20 | 3.2  | 5.8  | 10.1         | 10.2              | 7.5                                 | 10.6              | 10.2              | 8.6                  |
| s21 | 3.7  | 5.4  | 12.0         | 11.8              | 10.2                                | 14.0              | 11.8              | 16.9                 |
| s22 | 0.9  | 0.5  | 1.0          | 2.3               | 1.0                                 | 1.9               | 2.0               | 4.6                  |
| s23 | 4.0  | 5.3  | 7.2          | 8.9               | 3.4                                 | 9.8               | 8.9               | 0.0                  |
| s24 | 4.8  | 6.2  | 10.6         | 11.1              | 5.7                                 | 12.2              | 11.5              | 14.5                 |
| s25 | 4.8  | 5.2  | 12.6         | 13.0              | 11.5                                | 11.5              | 12.6              | 17.6                 |
| s26 | 0.0  | 0.0  | 0.0          | 0.0               | 0.0                                 | 0.0               | 0.0               | 5.6                  |
| s27 | 0.6  | 0.8  | 2.5          | 3.7               | 3.5                                 | 3.0               | 3.4               | 7.1                  |

**Table S3.** Calculated equilibrium side chain torsional angles in the 27 C<sub>3</sub>-symmetric conformations of the K<sup>+</sup>-valinomycin complex

| Conformer | HF/3-21G |       |       | BPW91/6-31G** |       |       |
|-----------|----------|-------|-------|---------------|-------|-------|
|           | D-Val    | L-Val | D-Hiv | D-Val         | L-Val | D-Hiv |
| s1        | 56       | 66    | 64    | 56            | 70    | 63    |
| s2        | 51       | 79    | -65   | 51            | 77    | -64   |
| s3        | 50       | 78    | 176   | 51            | 75    | -177  |
| s4        | -74      | 77    | 176   | -73           | 75    | -178  |
| s5        | -77      | 75    | 67    | -76           | 73    | 62    |
| s6        | -72      | 78    | -63   | -72           | 76    | -64   |
| s7        | -177     | 77    | -63   | -178          | 75    | -63   |
| s8        | -178     | 77    | 64    | -178          | 76    | 64    |
| s9        | -176     | 76    | 176   | -179          | 74    | 179   |
| s10       | 56       | -53   | 64    | 56            | -53   | 63    |
| s11       | 52       | -51   | -65   | 53            | -52   | -66   |
| s12       | 53       | -55   | 178   | 53            | -56   | -177  |
| s13       | -77      | -50   | 63    | -74           | -50   | 62    |
| s14       | -66      | -56   | -63   | -67           | -57   | -64   |
| s15       | -69      | -56   | 178   | -66           | -56   | 177   |
| s16       | -179     | -58   | 64    | -178          | -56   | 62    |
| s17       | 180      | -62   | -58   | 180           | -58   | -62   |
| s18       | -177     | -57   | 180   | 180           | -57   | 180   |
| s19       | 58       | 175   | 62    | 58            | 180   | 63    |
| s20       | 53       | 176   | -69   | 53            | 177   | -69   |
| s21       | 48       | 178   | 177   | 49            | 178   | 180   |
| s22       | 179      | 177   | -65   | -178          | 163   | -66   |
| s23       | -76      | 174   | 61    | -75           | 179   | 63    |
| s24       | -72      | 178   | -68   | -77           | 178   | -69   |
| s25       | -74      | 177   | 176   | -73           | 176   | 179   |
| s26       | -179     | 179   | 64    | -178          | 178   | 63    |
| s27       | -177     | 177   | 176   | -178          | 178   | 179   |

**Table S4.** Twelve AM1 lowest energy conformers, calculated isopropyl torsional angles, relative energies, and Boltzmann populations ( $C_3$  symmetric conformers are on the red background)

a) Torsional angles (BPW91/6-31G\*\*)

| Conf. | D-Val | L-Val | D-Hiv | D-Val | L-Val | D-Hiv | D-Val | L-Val | D-Hiv |
|-------|-------|-------|-------|-------|-------|-------|-------|-------|-------|
| 1     | -173  | 173   | 66    | -173  | 173   | 66    | -173  | 173   | 66    |
| 2     | -173  | 173   | 66    | -173  | 173   | 65    | -173  | 173   | -178  |
| 3     | -173  | 173   | 66    | -172  | 173   | -67   | -173  | 173   | 66    |
| 4     | -173  | 173   | -179  | -173  | 173   | 65    | -173  | 173   | -178  |
| 5     | -173  | 173   | 66    | -172  | 173   | -67   | -173  | 173   | -178  |
| 6     | -173  | 173   | -67   | -172  | 172   | -67   | -173  | 173   | 66    |
| 7     | -173  | 173   | -179  | -173  | 172   | -67   | -174  | 173   | 66    |
| 8     | -173  | 173   | -179  | -173  | 172   | -178  | -173  | 173   | -178  |
| 9     | -173  | 172   | -67   | -173  | 172   | -178  | -173  | 173   | -178  |
| 10    | -173  | 172   | -67   | -172  | 172   | -67   | -173  | 173   | -67   |
| 11    | -173  | 172   | -67   | -172  | 172   | -67   | -173  | 173   | -178  |
| 12    | -173  | 174   | 66    | -173  | 173   | 66    | 57    | 173   | 67    |

b) Relative energies

| Conf. | AM1 | PM3 | bpw91<br>6-<br>31G** | bpw91 <sup>a</sup><br>6-<br>31G** | B3LYP<br>6-<br>31G** | B3LYP<br>6-<br>311++G** | population<br>Cal. <sup>c</sup> | population<br>Exp. <sup>d</sup> |
|-------|-----|-----|----------------------|-----------------------------------|----------------------|-------------------------|---------------------------------|---------------------------------|
| 1     | 0.0 | 0.0 | 0.0                  | 0.0                               | 0.0                  | 0.0                     | 28                              | 39                              |
| 2     | 0.2 | 0.4 | 1.4                  | 1.3                               | 1.2                  | 1.6                     | 9                               |                                 |
| 3     | 0.2 | 0.2 | 0.8                  | 0.6                               | 0.7                  | 0.9                     | 29                              | 43                              |
| 4     | 0.4 | 0.6 | 2.6                  | 2.2                               |                      |                         | 2                               |                                 |
| 5     | 0.4 | 0.5 | 2.2                  | 1.7                               |                      |                         | 5                               |                                 |
| 6     | 0.5 | 0.4 | 1.5                  | 1.1                               | 1.5                  | 1.6                     | 14                              | 18                              |
| 7     | 0.5 | 0.5 | 2.1                  | 1.6                               |                      |                         | 6                               |                                 |
| 8     | 0.5 | 0.9 | 3.8                  | 3.0                               |                      |                         | 0                               |                                 |
| 9     | 0.7 | 0.8 | 3.3                  | 2.5                               |                      |                         | 1                               |                                 |
| 10    | 0.7 | 0.5 | 2.3                  | 1.7                               |                      |                         | 2                               |                                 |
| 11    | 0.7 | 0.6 | 2.9                  | 2.2                               |                      |                         | 2                               |                                 |
| 12    | 0.8 | 1.2 | 3.6                  | 2.7                               |                      |                         | 1                               |                                 |

<sup>a</sup> CPCM(methanol) solvent correction

<sup>c</sup> based on the BPW91/6-31G\*\*/CPCM(methanol) energies

<sup>d</sup> based on the ROA spectral decomposition

**Table S5.** Functional performance comparison. For the L-Lac-L-Val-D-Hiv-D-Val-K<sup>+</sup> fragment, torsion angles constrained to mimic valinomycin complex, CPCM model with MeOH, 6-311++G\*\* basis set. See also Figure S6.

| functional | $\Delta_{\text{RAM}}$ | $\Delta_{\text{FREQ}}$ | s     | t [days] |
|------------|-----------------------|------------------------|-------|----------|
| B3LYP      | 0.25                  | 16                     | 1.015 | 6.3      |
| M5         | 0.28                  | 34                     | 1.034 | 7.5      |
| M06        | 0.25                  | 24                     | 1.024 | 8.4      |
| M06L       | 0.28                  | 22                     | 1.022 | 6.8      |
| M062X      | 0.32                  | 37                     | 1.037 | 11.5     |
| B3PW91     | 0.27                  | 21                     | 1.022 | 8.9      |

$\Delta_{\text{RAM}}$  - RMS error of calculated Raman spectral intensities, against normalized experimental spectrum

$\Delta_{\text{FREQ}}$  - average absolute deviation against selected experimental (408, 745, 1129, 1315, 1450, 1647 and 1756 cm<sup>-1</sup>) frequencies

s - slope of a linear fit to the experimental frequencies

t - time of the frequency (with the Raman and ROA options) Gaussian calculation, per one Intel Xeon E5530 CPU at 2.40GHz

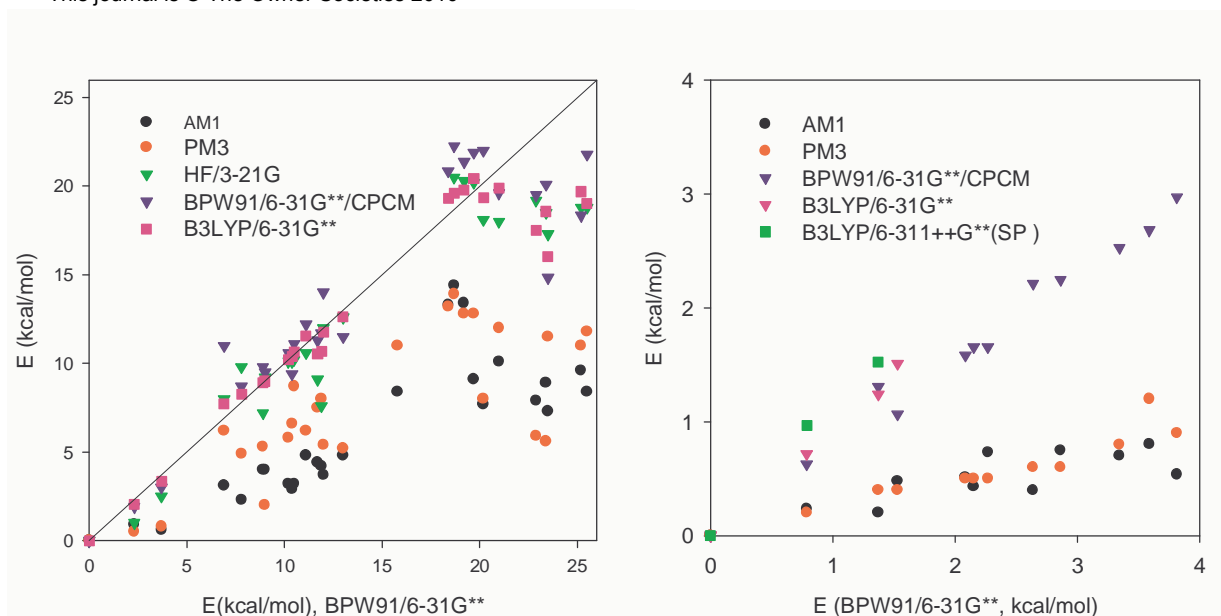

**Figure S1.** Relative energies of the (left) 27 symmetric ( $C_3$ ) and (right) 12 lowest-AM1 energy valinomycin. $K^+$  conformers calculated at different approximation levels. For the AM1 and PM3 methods a pseudo-atom was used instead of  $K^+$  as described in the text.

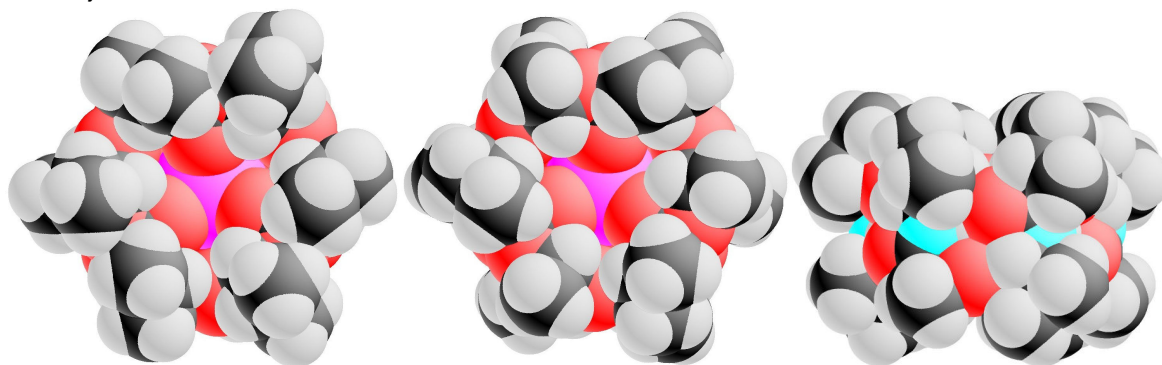

**Figure S2.** Lowest-energy conformation (BPW91/6-31G\*\*/CPCM(MeOH)) of the potassium-valinomycin complex, top, bottom and side view.



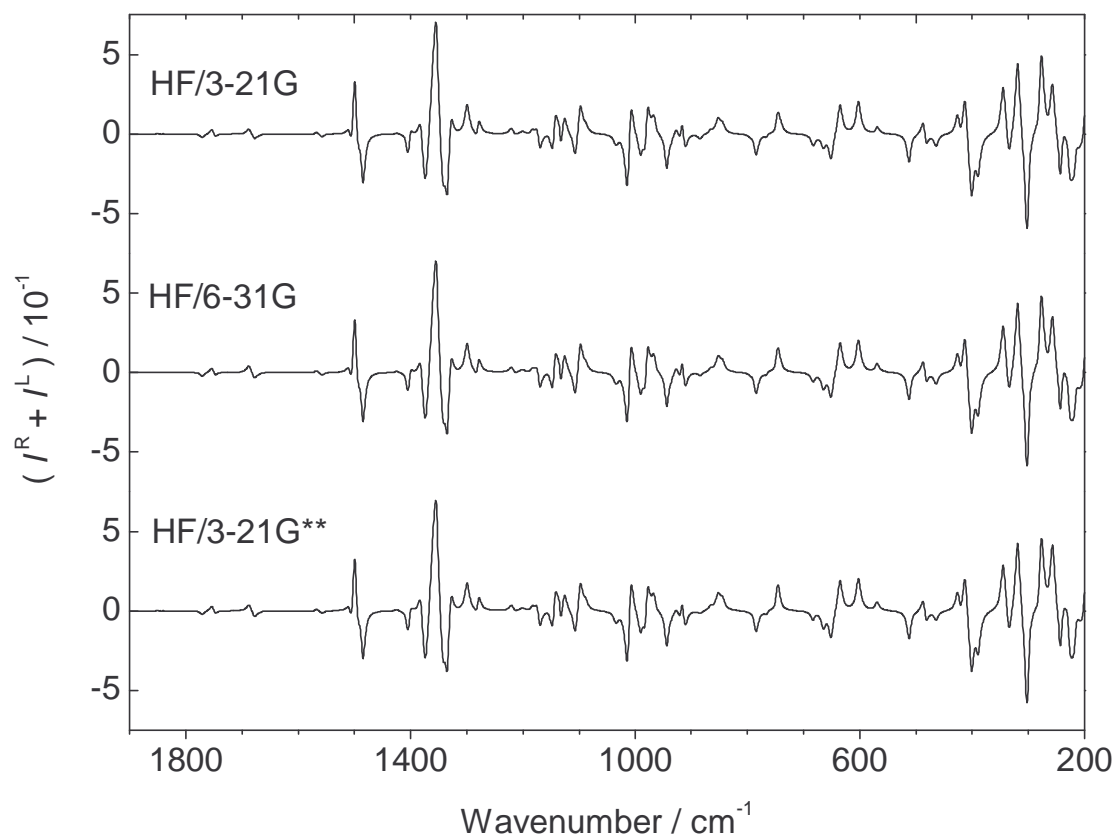

**Figure S3.** ROA complex spectra simulated with the local  $G'$  and  $A$  tensor parts at the HF/3-21G, HF/6-31G and HF/6-31G\*\* levels, with the B3LYP/6-31++G\*\*/CPCM force field and Raman polarizability.

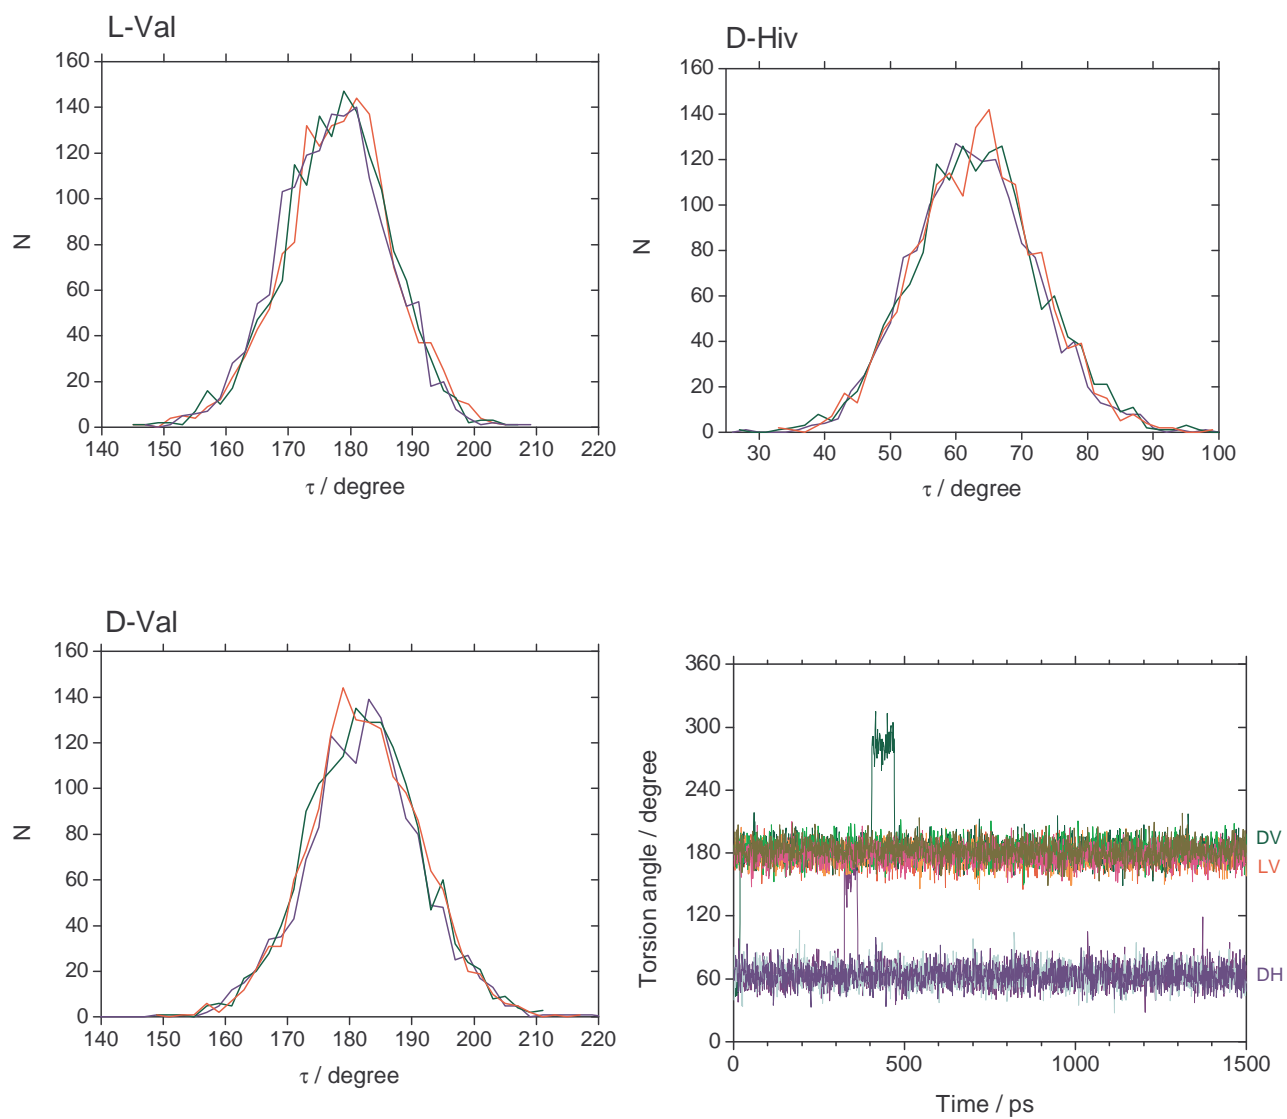

**Figure S4.** Distribution of the isopropyl torsional angles obtained from the MD simulations, and their time development (L-Val: red, D-Hiv: blue, D-Val: green) during a 1.5 ns run.

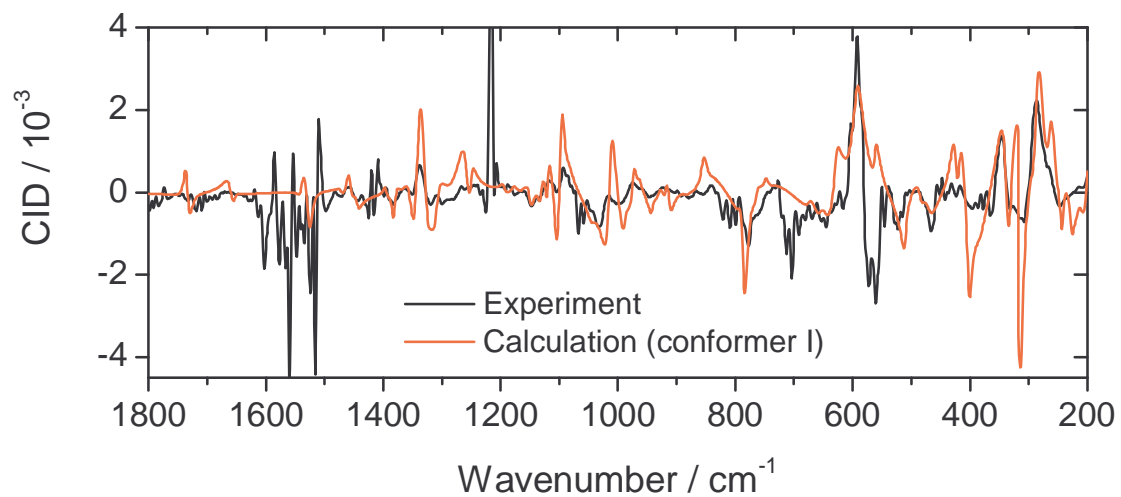

**Figure S5.** Experimental and calculated  $CID=(I^R-I^L)/(I^R+I^L)$  ratios obtained by a direct division of the ROA and Raman spectra.

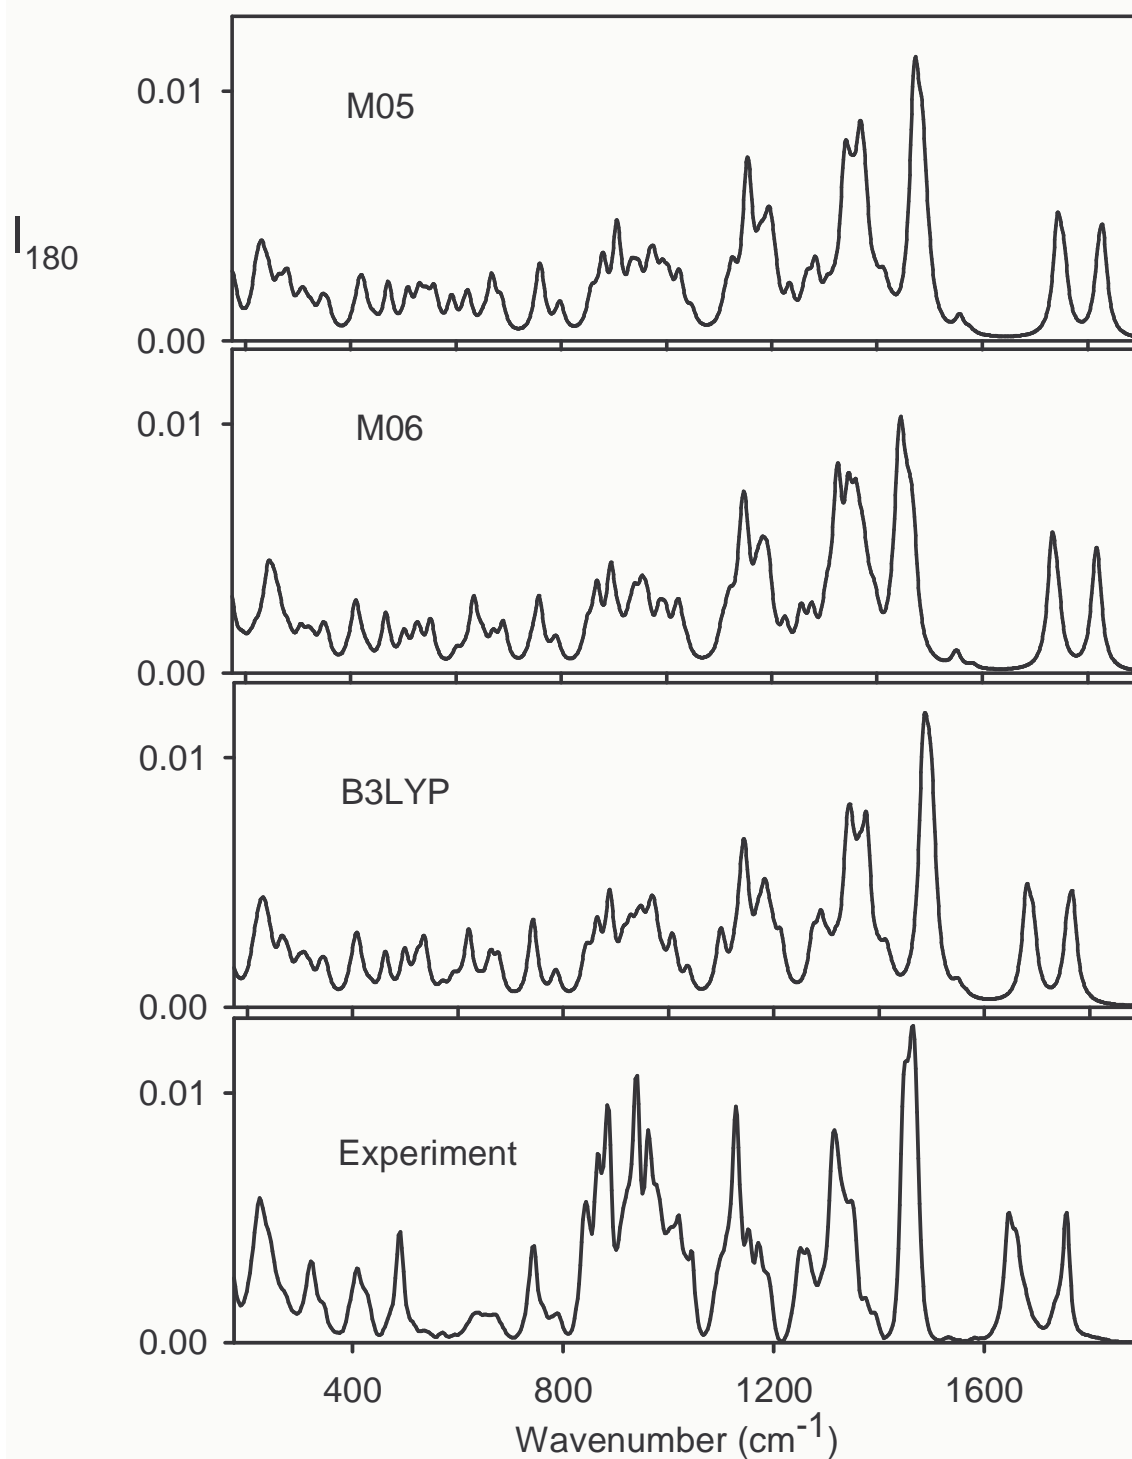

**Figure S6.** Raman spectra of the L-Lac-L-Val-D-Hiv-D-Val-K<sup>+</sup> model fragment calculated with several functionals (6-311++G\*\* basis, CPCM(MeOH), and the valinomicin complex spectrum. See also Table S5.

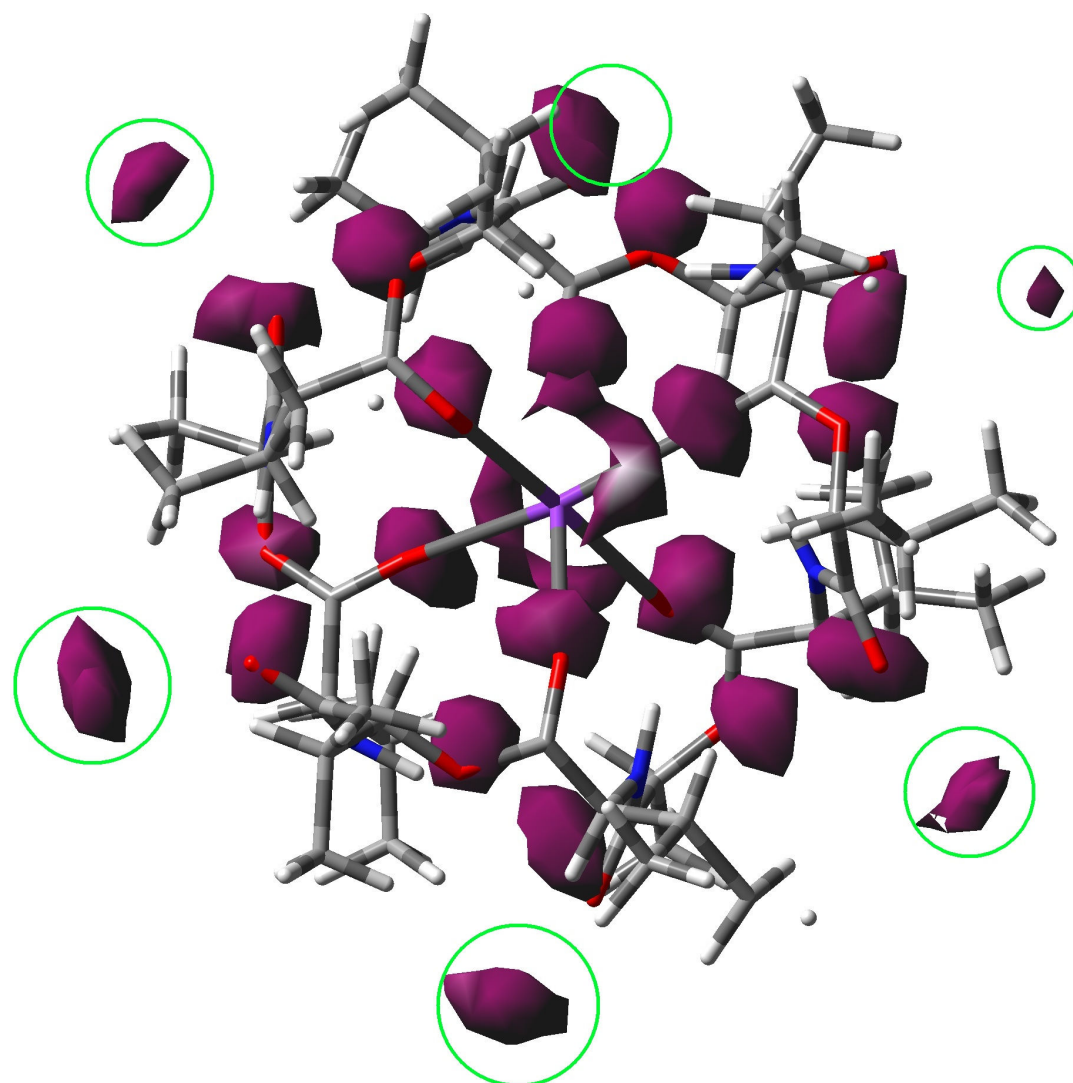

**Figure S7.** Oxygen probability distribution (methanol oxygens in green circles, first hydration sphere included only) obtained for the valinomycin complex soaked in methanol. The distribution is based on MD computation, periodic (30Å)<sup>3</sup> box, NVT ensemble, 1 fs integration step, 1.5 ns simulation (sampled at 1 ps intervals), Amber 99 force field<sup>1</sup> and the Tinker software.<sup>2</sup>

1. J. Wang, P. Cieplak and P. A. Kollman, *J. Comput. Chem.*, 2000, **21**, 1049-1074.
2. J. W. Ponder, Washington University School of Medicine, Saint Louis, 3.8 edn., 2000.

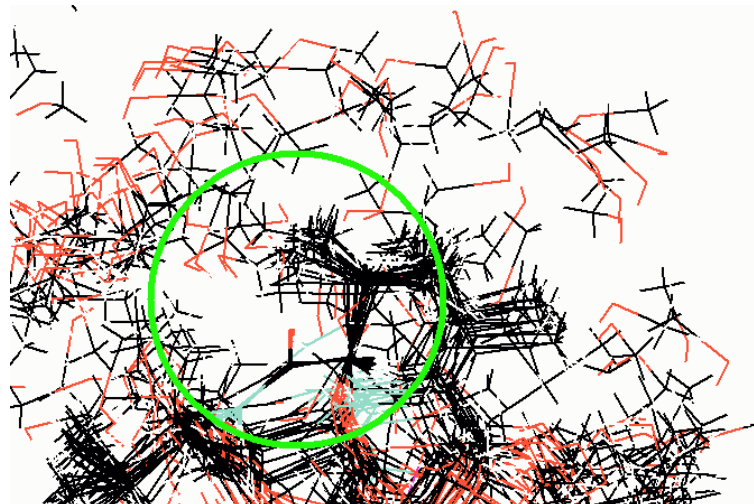

**Figure S8.** Twenty random MD snapshots (MD parameters are listed in caption of Figure S7) of the valinomycin complex and methanol molecules closest to the amide group within the green circle.

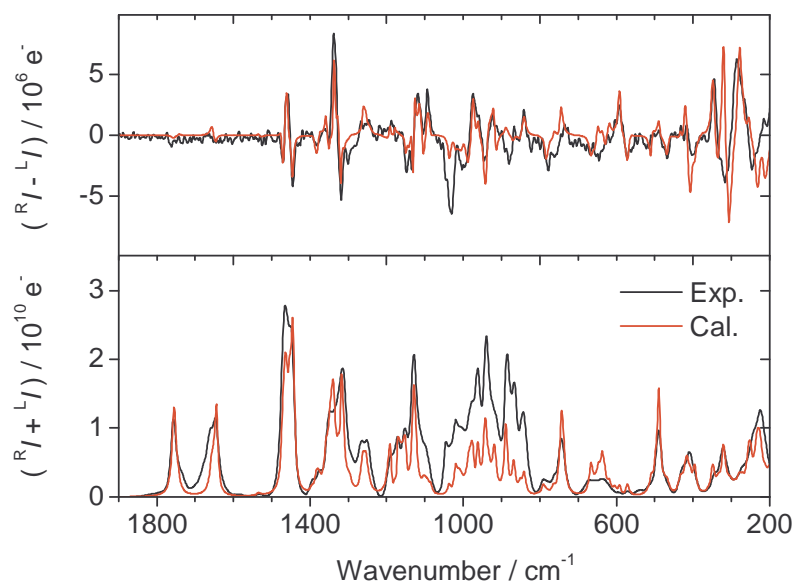

**Figure S9.** The fitted (red, based on the B3BPW91/6-31++G\*\*/CPCM(MeOH)/HF/6-31G\*\* conformer subspectra) and experimental (black) ROA (top) and Raman (bottom) spectra of the  $K^+$ -valinomycin complex.
